# Supplementary material for: An estimation of the correctness of XRD results obtained from the analysis of materials with bimodal crystallite size distribution
Source: Royal Society of Chemistry journal article supplement (doi:10.1039/c5ce01799h), 2015-01-01
Supplement: c5ce01799h1.pdf [file c5ce01799h1.pdf]

Supplementary material for manuscript "An estimation of correctness of XRD results  
obtained at analysis of materials with bimodal crystallite size distribution".

V.Uvarov\* and I. Popov

*The Unit for Nanoscopic Characterization, the Center for Nanoscience and Nanotechnology, the  
Hebrew University of Jerusalem, Jerusalem, 91904, Israel*

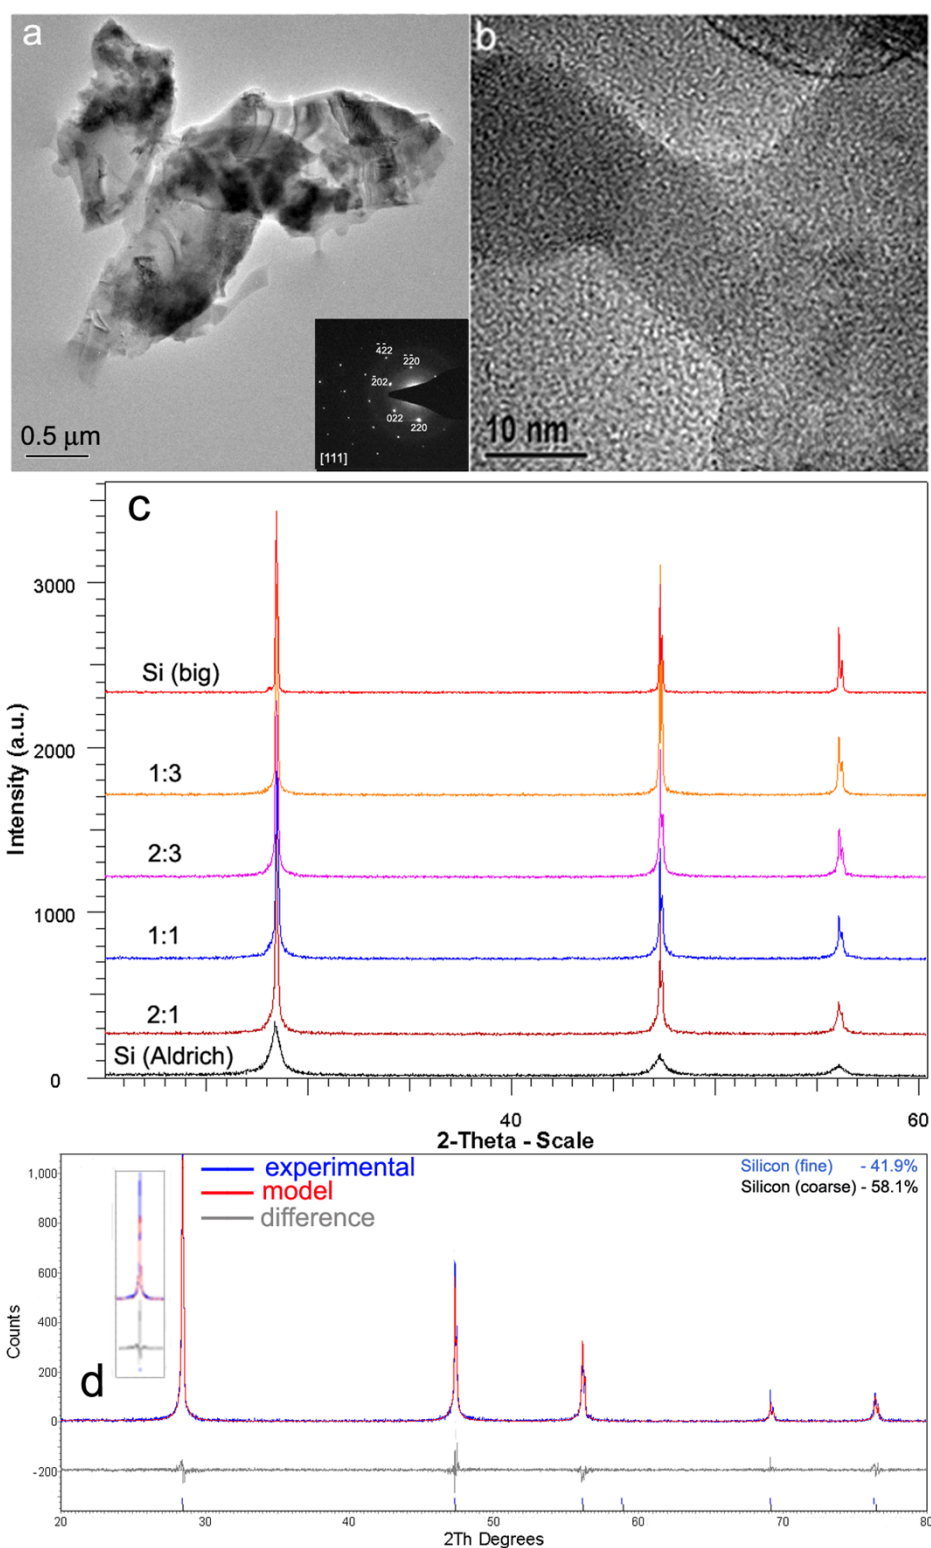

Fig.S1. TEM images of "coarse" (a) and "fine" (b) Si crystallites, in inset the electron diffraction pattern obtained from [111] zone axis of Si crystal; XRD patterns acquired from the same and their mixtures (c) and graphical representation of Rietveld refinement results for 2:3 mixture (d). In inset the results obtained at the assumption that samples contain only one phase.

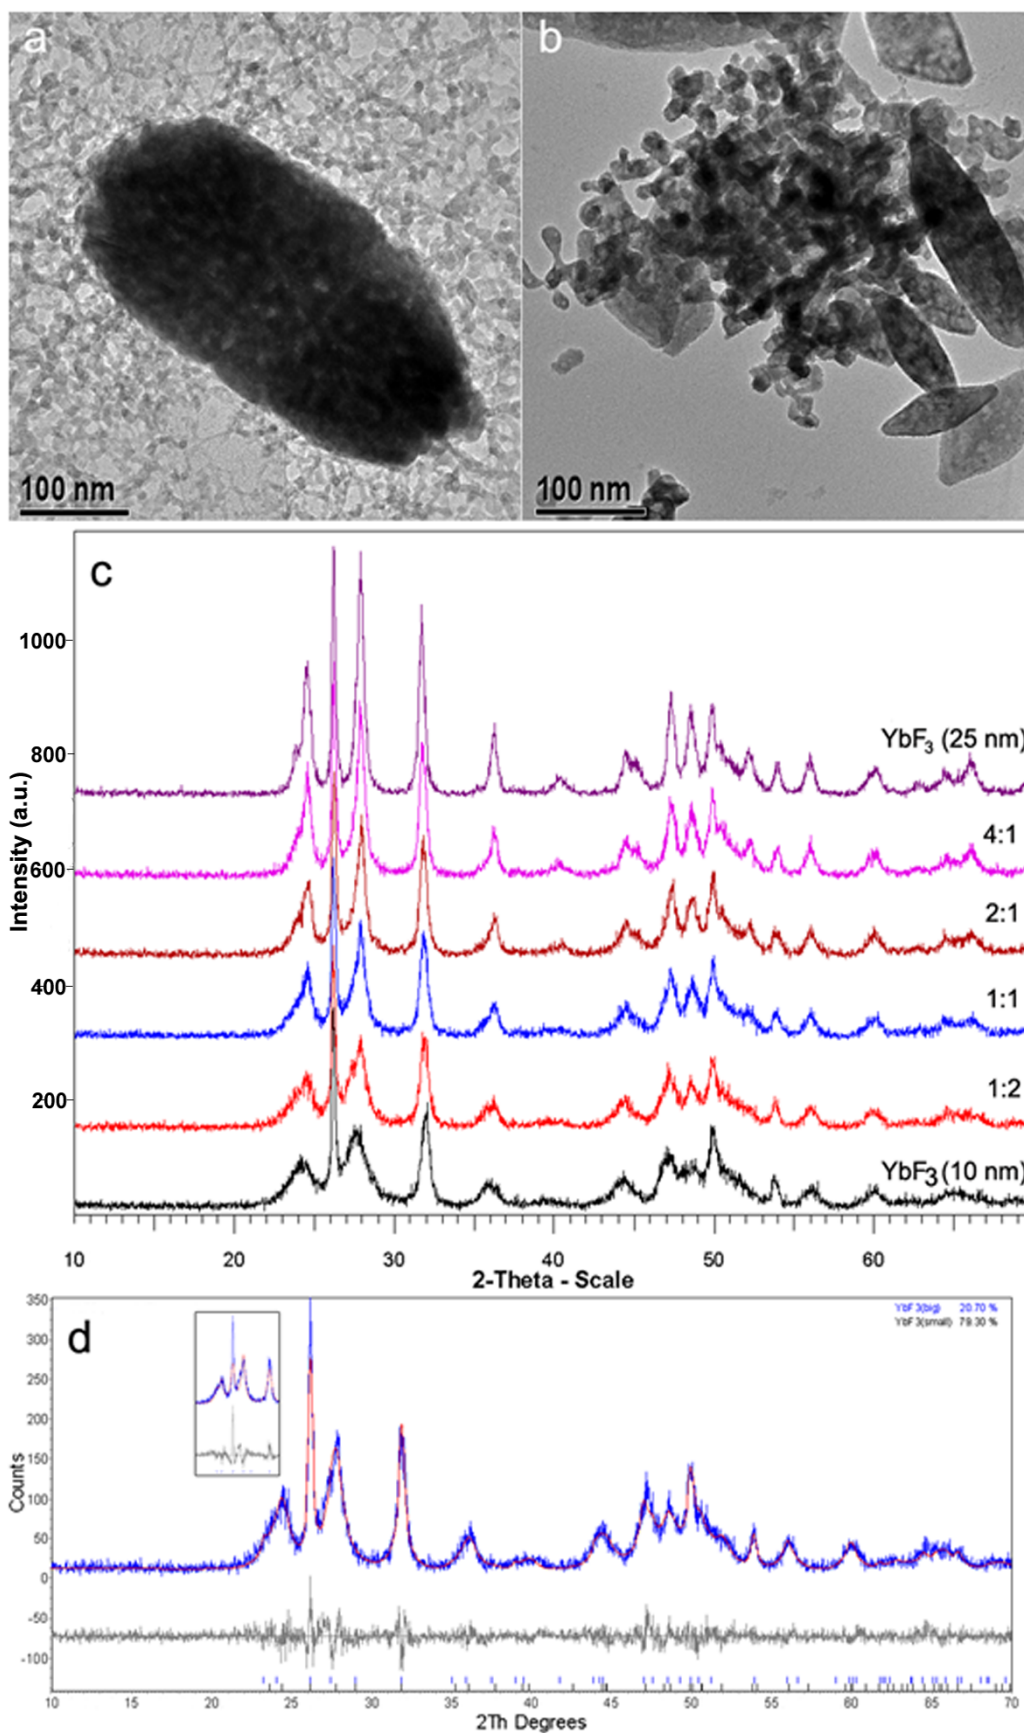

Fig.S2. TEM images of "small" (a) and "big" (b) YbF<sub>3</sub> crystallites, XRD patterns acquired from the same and their mixtures (c) and graphical representation of Rietveld refinement results for 83:17 mixture (d). In insets the results obtained at the assumption that samples contain only one phase.

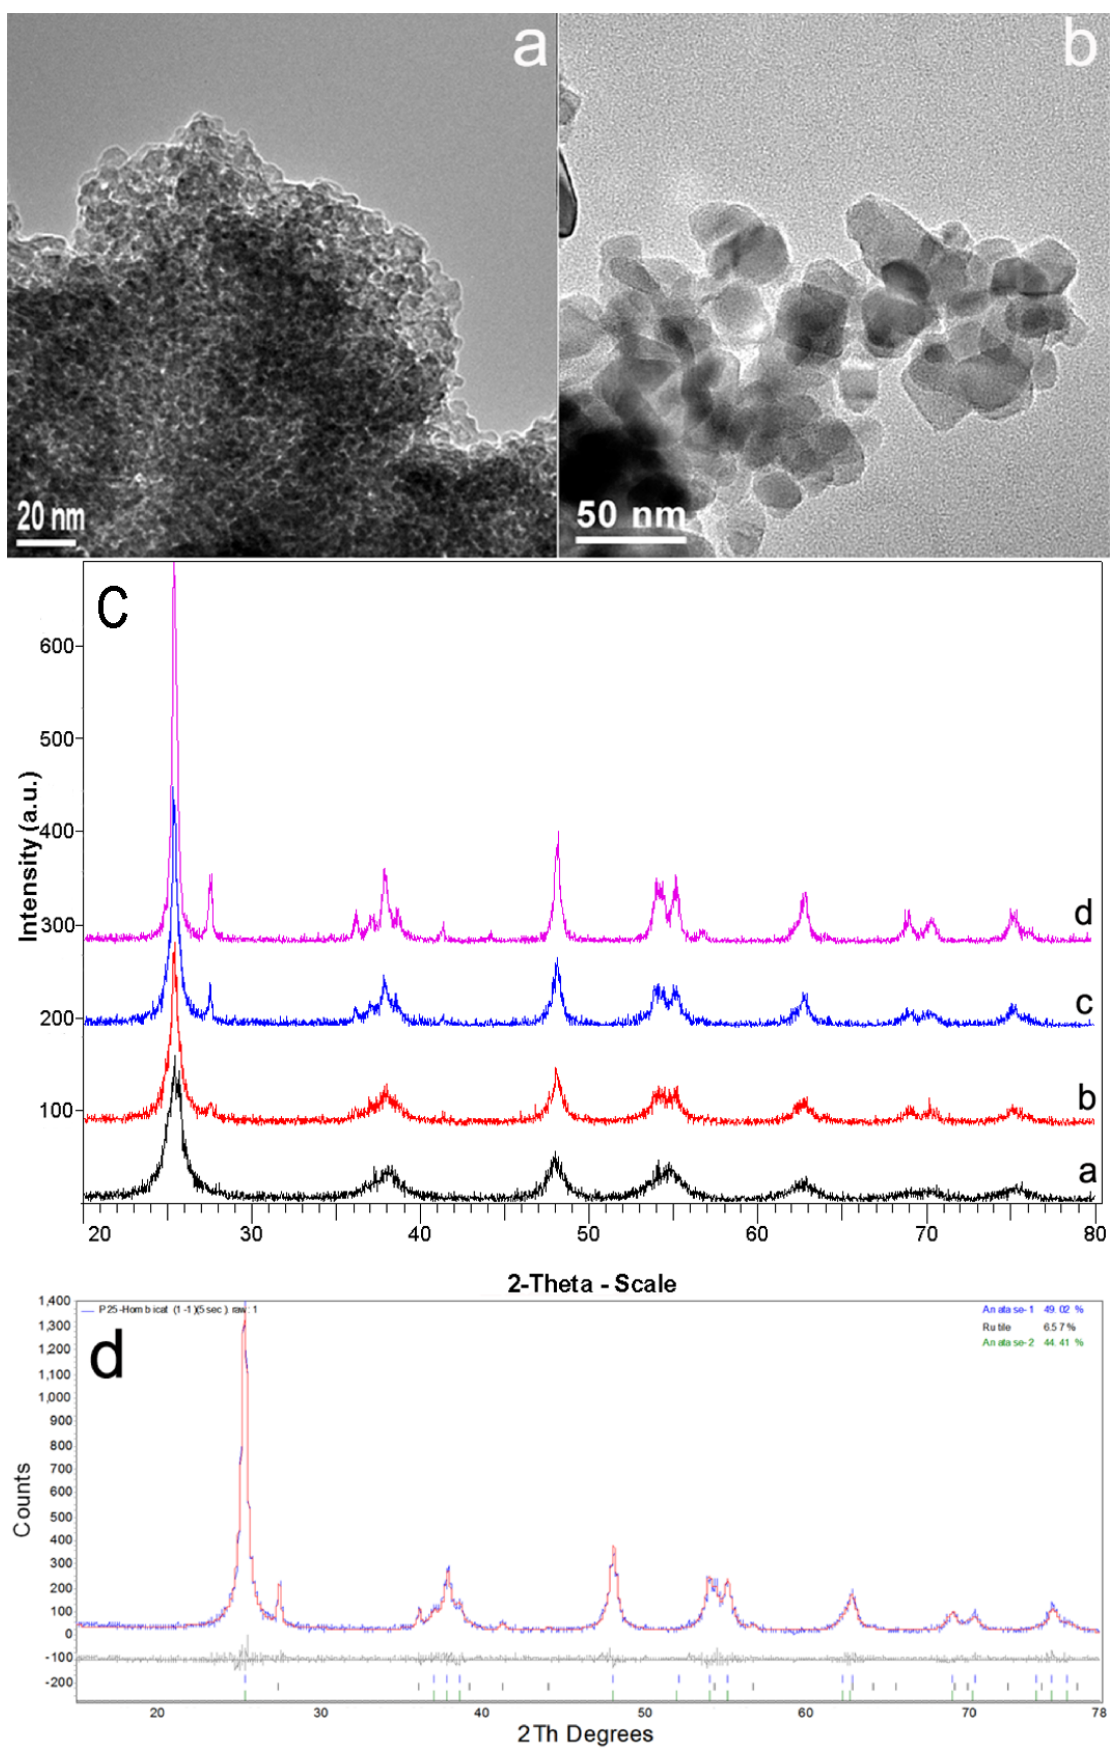

Fig.S3. TEM images of "small" (a) and "big" (b) anatase crystallites, XRD patterns acquired from the same and their mixtures (c) and graphical representation of Rietveld refinement results for 50:50 mixture (d).

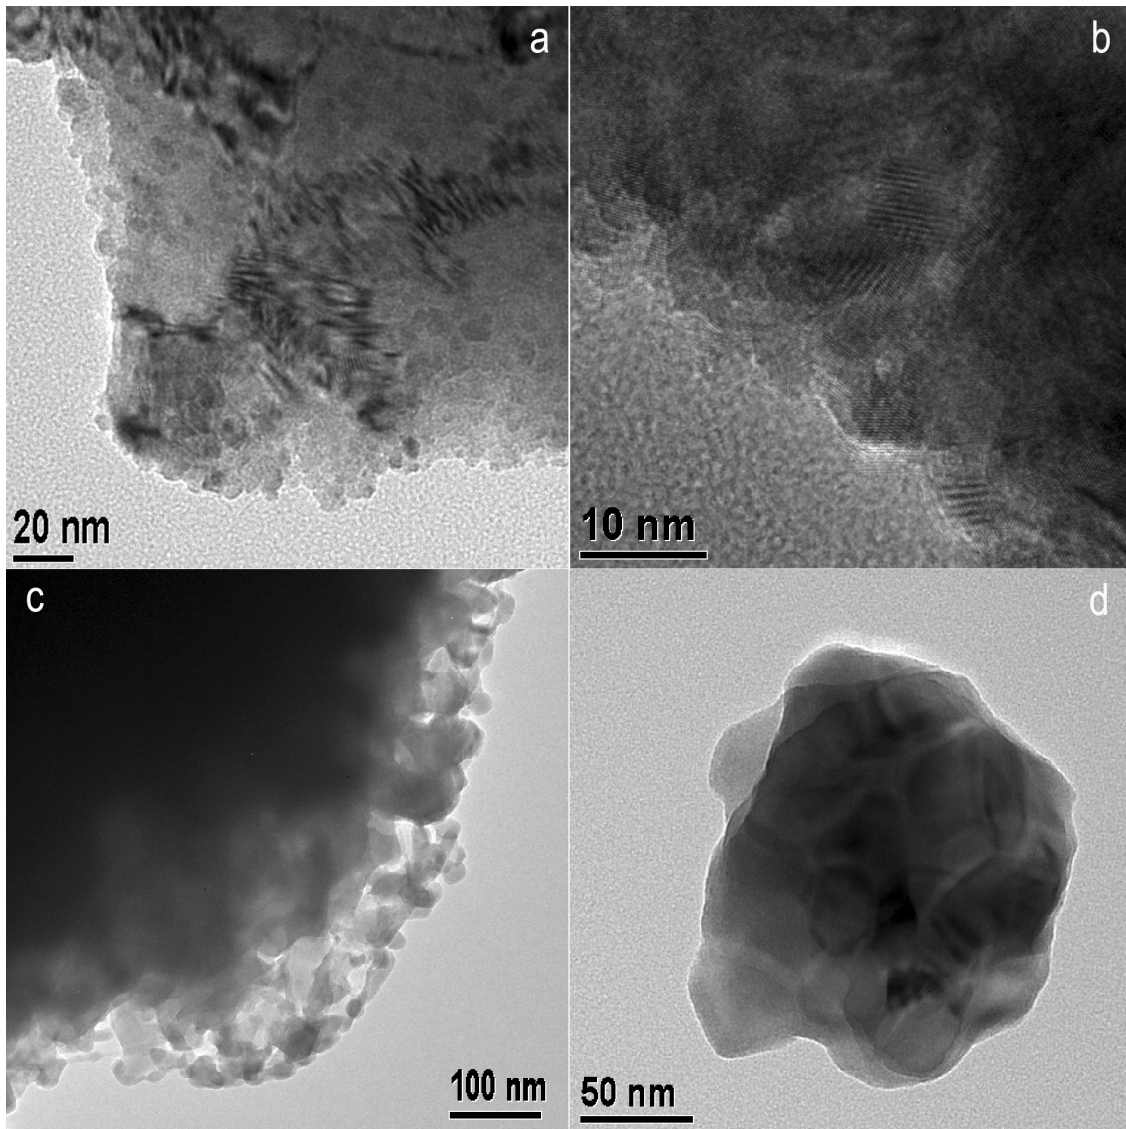

Fig.S4. TEM images obtained from Cu<sub>2</sub>O (*a* and *b*) and Se (*c* and *d*) specimens.

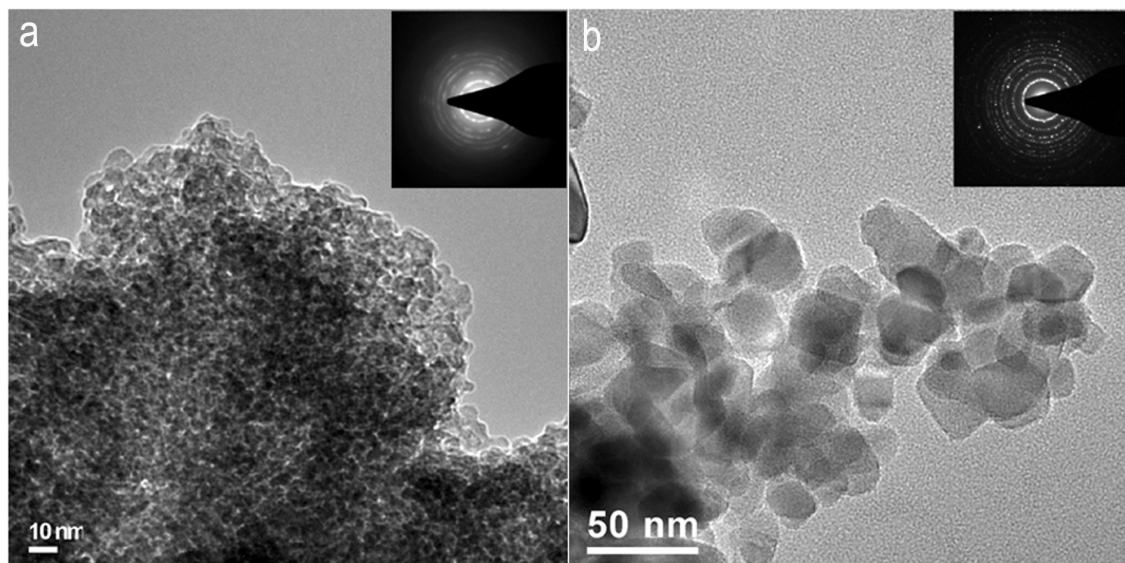

Fig.S5. TEM images obtained from Rutile with crystallite size of 13nm (*a*) and Rutile with crystallite size of 24.8 nm (*b*).

## Example of full Rietveld refinement results (TOPAS software):

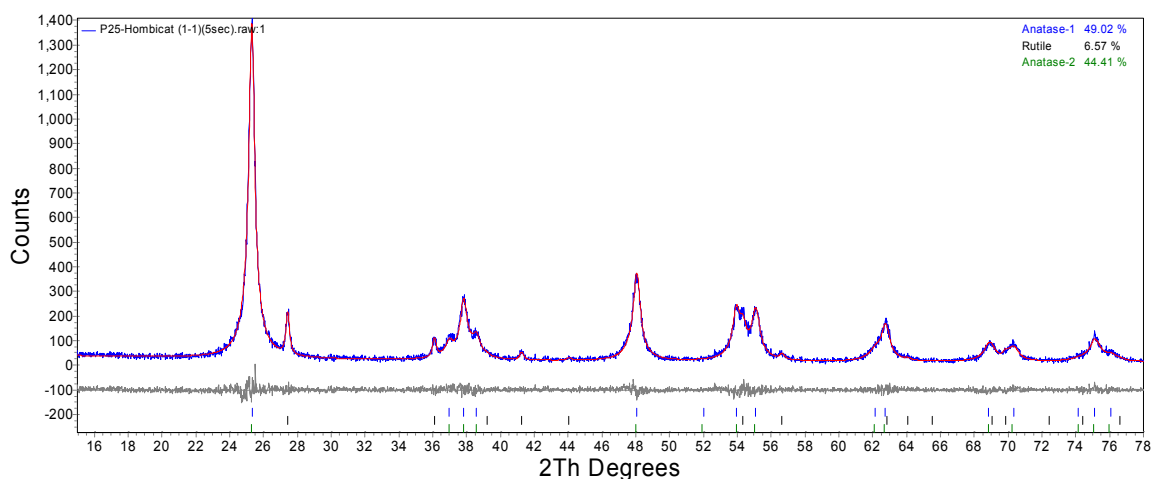

### File 1 : "P25-Hombicat (1-1).raw"

#### R-Values

Re<sub>p</sub> : 12.31    R<sub>w</sub> : 13.23    R<sub>p</sub> : 9.39    GOF : 1.07  
Re<sub>p</sub> : 16.33    R<sub>w</sub> : 17.55    R<sub>p</sub> : 13.42    DW : 1.82

#### Quantitative Analysis - Rietveld

|         |             |             |
|---------|-------------|-------------|
| Phase 1 | : Anatase-1 | 49.0 (45) % |
| Phase 2 | : Rutile    | 6.57 (75) % |
| Phase 3 | : Anatase-2 | 44.4 (44) % |

#### Background

|                                   |   |             |
|-----------------------------------|---|-------------|
| Chebyshev polynomial, Coefficient | 0 | 21.60 (22)  |
|                                   | 1 | -12.21 (32) |
|                                   | 2 | 4.74 (23)   |
|                                   | 3 | -0.67 (20)  |

#### Instrument

|                            |       |
|----------------------------|-------|
| Primary radius (mm)        | 217.5 |
| Secondary radius (mm)      | 217.5 |
| Receiving slit width (mm)  | 0.2   |
| Divergence angle (°)       | 1     |
| Full Axial Convolution     |       |
| Filament Length (mm)       | 12    |
| Sample Length (mm)         | 15    |
| Receiving Slit Length (mm) | 12    |
| Primary Soller (°)         | 2.3   |
| Secondary Soller (°)       | 2.3   |

#### Corrections

|                                  |             |
|----------------------------------|-------------|
| Zero Error                       | 0.02 (33)   |
| Specimen displacement            | -0.00 (60)  |
| LP Factor                        | 26.4        |
| Surface Roughness Pitschke et al | 0.0789 (73) |
| Absorption (1/cm)                | 14 (12)     |
| Sample Thickness (mm)            | 0.25        |

#### Structure 1

|             |              |
|-------------|--------------|
| Phase name  | Anatase-1    |
| R-Bragg     | 1.235        |
| Space group | I41/amdZ     |
| Scale       | 0.00085 (12) |
| Cell Mass   | 319.516      |

Cell Volume (Å<sup>3</sup>) 135.97(26)  
 Wt% - Rietveld 49.0(45)  
 Crystallite Size  
 Cry Size Lorentzian (nm) 29.9(31)  
 k: 1 LVol-IB (nm) 19.1(19)  
 k: 0.89 LVol-FWHM (nm) 26.6(27)  
 Crystal Linear Absorption Coeff. (1/cm) 486.02(91)  
 Crystal Density (g/cm<sup>3</sup>) 3.9021(73)  
 Lattice parameters  
 a (Å) 3.7827(32)  
 c (Å) 9.5026(79)

| Site | Np | x       | y       | z       | Atom Occ | Beg      |
|------|----|---------|---------|---------|----------|----------|
| Ti1  | 4  | 0.00000 | 0.25000 | 0.37500 | Ti+4 1   | 2.31(52) |
| O1   | 8  | 0.00000 | 0.25000 | 0.17060 | O-2 1    | 2.59(44) |

### Structure 2

Phase name Rutile  
 R-Bragg 1.815  
 Space group P42/mnm  
 Scale 0.000496(38)  
 Cell Mass 159.758  
 Cell Volume (Å<sup>3</sup>) 62.35(12)  
 Wt% - Rietveld 6.57(75)  
 Crystallite Size  
 Cry Size Lorentzian (nm) 51.1(42)  
 k: 1 LVol-IB (nm) 32.5(27)  
 k: 0.89 LVol-FWHM (nm) 45.5(37)  
 Crystal Linear Absorption Coeff. (1/cm) 530.0(10)  
 Crystal Density (g/cm<sup>3</sup>) 4.2549(81)  
 Preferred Orientation Spherical Harmonics  
 Order 4  
 y00 1  
 y20 0.593(90)  
 y40 0.14(12)  
 y44p -0.295(80)  
 Lattice parameters  
 a (Å) 4.5924(39)  
 c (Å) 2.9562(25)

| Site | Np | x       | y       | z       | Atom Occ | Beg      |
|------|----|---------|---------|---------|----------|----------|
| Ti1  | 2  | 0.00000 | 0.00000 | 0.00000 | Ti+4 1   | 1.58(51) |
| O1   | 4  | 0.31860 | 0.31860 | 0.00000 | O-2 1    | 2.38(64) |

### Structure 3

Phase name Anatase-2  
 R-Bragg 1.504  
 Space group I41/amdZ  
 Scale 0.000766(98)  
 Cell Mass 319.516  
 Cell Volume (Å<sup>3</sup>) 136.38(27)  
 Wt% - Rietveld 44.4(44)  
 Crystallite Size  
 Cry Size Lorentzian (nm) 10.15(60)  
 k: 1 LVol-IB (nm) 6.46(38)  
 k: 0.89 LVol-FWHM (nm) 9.03(53)  
 Crystal Linear Absorption Coeff. (1/cm) 484.55(97)  
 Crystal Density (g/cm<sup>3</sup>) 3.8903(78)  
 Lattice parameters  
 a (Å) 3.7888(33)  
 c (Å) 9.5008(92)

| Site | Np | x | y | z | Atom Occ | Beg |
|------|----|---|---|---|----------|-----|
|------|----|---|---|---|----------|-----|

|     |   |         |         |         |      |   |           |
|-----|---|---------|---------|---------|------|---|-----------|
| Ti1 | 4 | 0.00000 | 0.25000 | 0.37500 | Ti+4 | 1 | 1.10 (33) |
| O1  | 8 | 0.00000 | 0.25000 | 0.17060 | O-2  | 1 | 2.92 (50) |

Table S1. Results of XRD analysis of hydroxylapatite mixtures with bimodal crystallite size distribution (EVA software).

| Components name                                                          | Mixtures description                  |       |                                           | Results of XRD analysis |                  |                    |                  |
|--------------------------------------------------------------------------|---------------------------------------|-------|-------------------------------------------|-------------------------|------------------|--------------------|------------------|
|                                                                          | Crystallite size <sup>1</sup> ,<br>nm |       | Components ratio<br>("small"/"big"),<br>% | "small" crystallites    |                  | "big" crystallites |                  |
|                                                                          | "small"                               | "big" |                                           | size,<br>nm             | percentage,<br>% | size,<br>nm        | percentage,<br>% |
| Hydroxylapatite,<br>Ca <sub>5</sub> (PO <sub>4</sub> ) <sub>3</sub> (OH) | 14                                    | 52    | 90:10                                     | 10.1                    | 74.5             | 42.7               | 25.8             |
|                                                                          |                                       |       | 75:25                                     | 11.5                    | 60.2             | 40.2               | 39.8             |
|                                                                          |                                       |       | 50:50                                     | 15.3                    | 57.4             | 64.8               | 42.6             |
|                                                                          |                                       |       | 20:80                                     | 12.7                    | 23.2             | 53.2               | 76.8             |

<sup>1</sup>Crystallite sizes of pure phases calculated using XRD method.

**Examples of XRD analyses of hydroxylapatite artificial mixtures with bimodal crystallite size distribution using EVA software:**

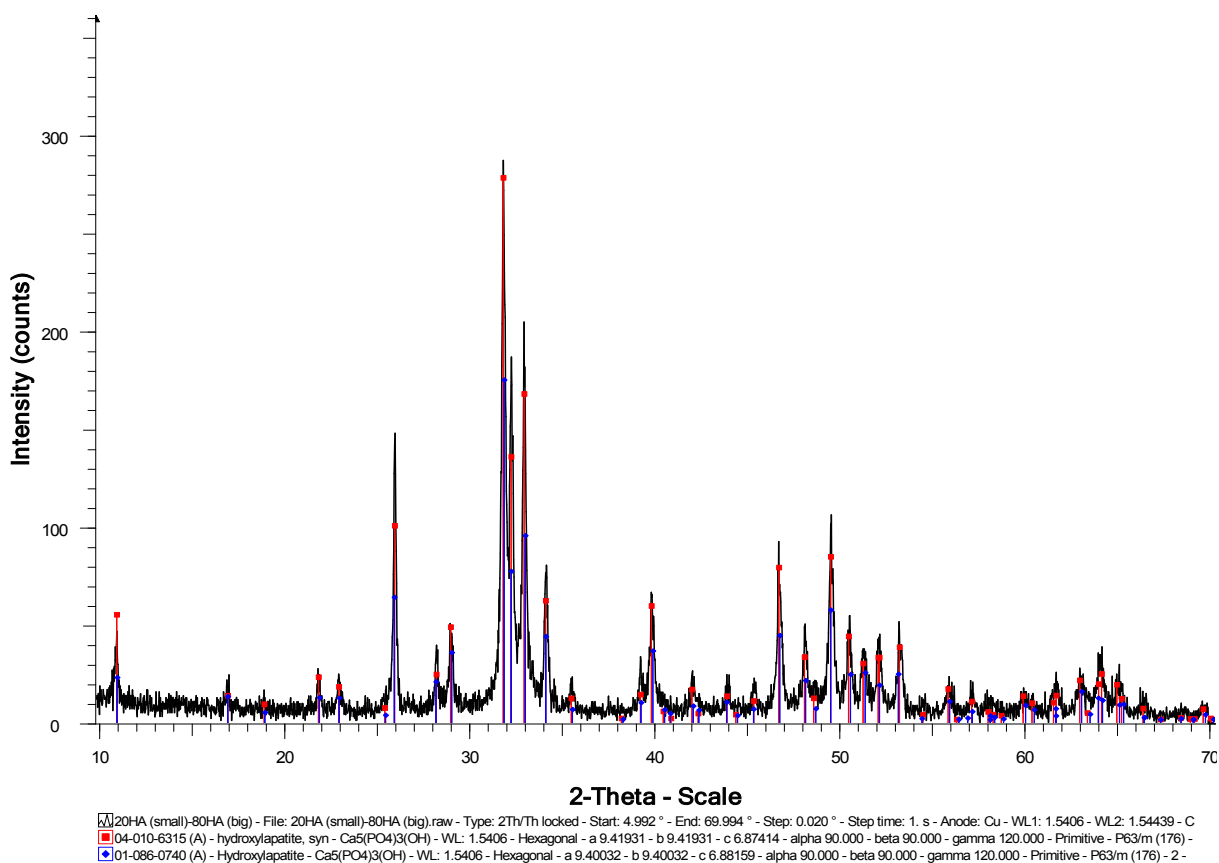

Sample name: 80HA (big)-20HA (small)

Concentrations:

04-010-6315 76.8% Ca<sub>5</sub>(PO<sub>4</sub>)<sub>3</sub>(OH)

Hydroxylapatite, syn

01-086-0740 23.2% Ca<sub>5</sub>(PO<sub>4</sub>)<sub>3</sub>(OH)

Hydroxylapatite

04-010-6315 Hydroxylapatite, syn----- Ca<sub>5</sub>(PO<sub>4</sub>)<sub>3</sub>(OH)

Crystallite Size (Scherrer): 532.3 Å

System: Hexagonal

Space group: P63/m (176)

Cell param.: Initial Final

a: 9.42183 9.41931

c: 6.87844 6.87414

01-086-0740 Hydroxylapatite----- Ca<sub>5</sub>(PO<sub>4</sub>)<sub>3</sub>(OH)

Crystallite Size (Scherrer): 127.2 Å

System: Hexagonal

Space group: P63/m (176)

Cell param.: Initial Final

a: 9.37276 9.40032

c: 6.87600 6.88159



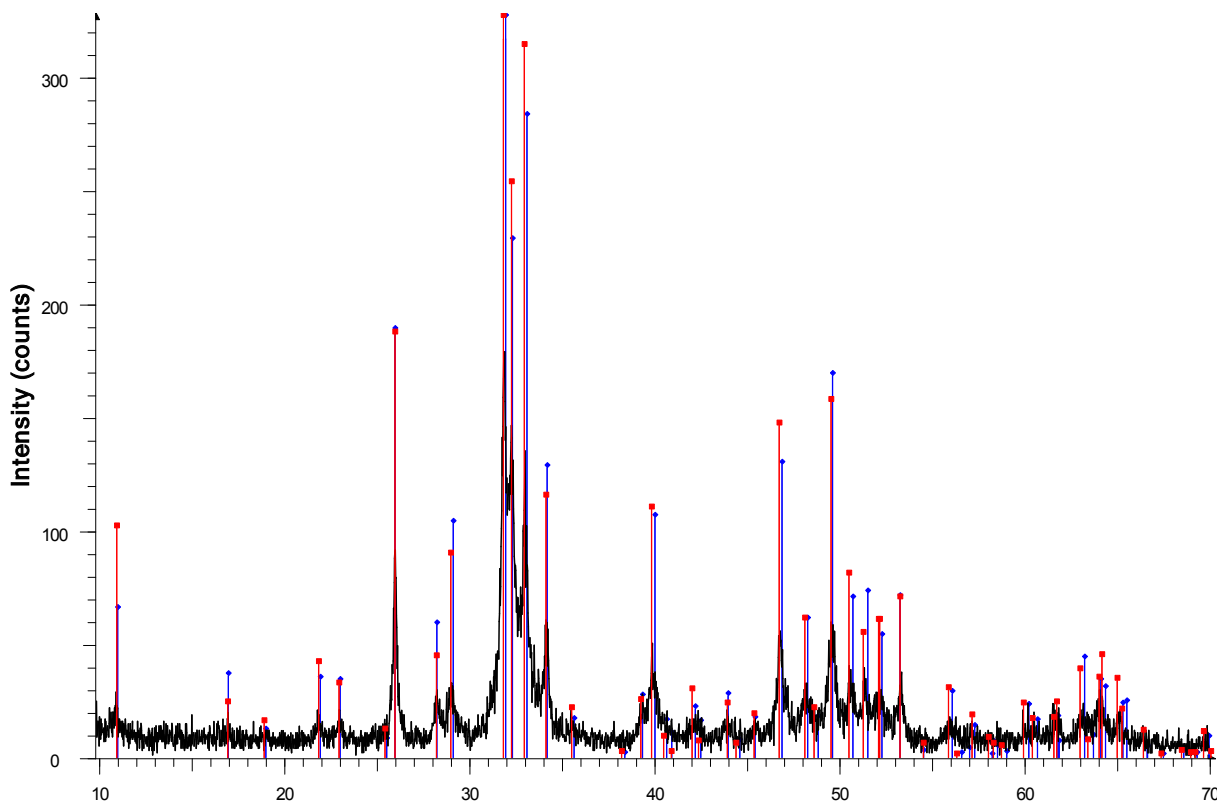

**2-Theta - Scale**

75HA (small)-25HA (big) - File: 75HA (small)-25HA (big).raw - Type: 2Th/Th locked - Start: 4.984 ° - End: 69.987 ° - Step: 0.020 ° - Step time: 1. s - Anode: Cu - WL1: 1.5406 - WL2: 1.54439 - C  
 04-010-6315 (A) - hydroxylapatite, syn - Ca5(PO4)3(OH) - WL: 1.5406 - Hexagonal - a 9.42264 - b 9.42264 - c 6.87535 - alpha 90.000 - beta 90.000 - gamma 120.000 - Primitive - P63/m (176) -  
 01-086-0740 (A) - Hydroxylapatite - Ca5(PO4)3(OH) - WL: 1.5406 - Hexagonal - a 9.38193 - b 9.38193 - c 6.87481 - alpha 90.000 - beta 90.000 - gamma 120.000 - Primitive - P63/m (176) - 2 -

**75HA (small)-25HA (big)**

Sample name: 25HA (big)-75HA (small)

Concentrations:

|             |       |               |                      |
|-------------|-------|---------------|----------------------|
| 04-010-6315 | 39.8% | Ca5(PO4)3(OH) | Hydroxylapatite, syn |
| 01-086-0740 | 60.2% | Ca5(PO4)3(OH) | Hydroxylapatite      |

04-010-6315 Hydroxylapatite, syn----- Ca5(PO4)3(OH)

Crystallite Size (Scherrer): 402.0 A

System: Hexagonal

Space group: P63/m (176)

Cell param.: Initial Final

a: 9.42319 9.42264

c: 6.87903 6.87535

01-086-0740 Hydroxylapatite----- Ca5(PO4)3(OH)

Crystallite Size (Scherrer): 115.0 A

System: Hexagonal

Space group: P63/m (176)

Cell param.: Initial Final

a: 9.35200 9.38193

c: 6.88200 6.87481

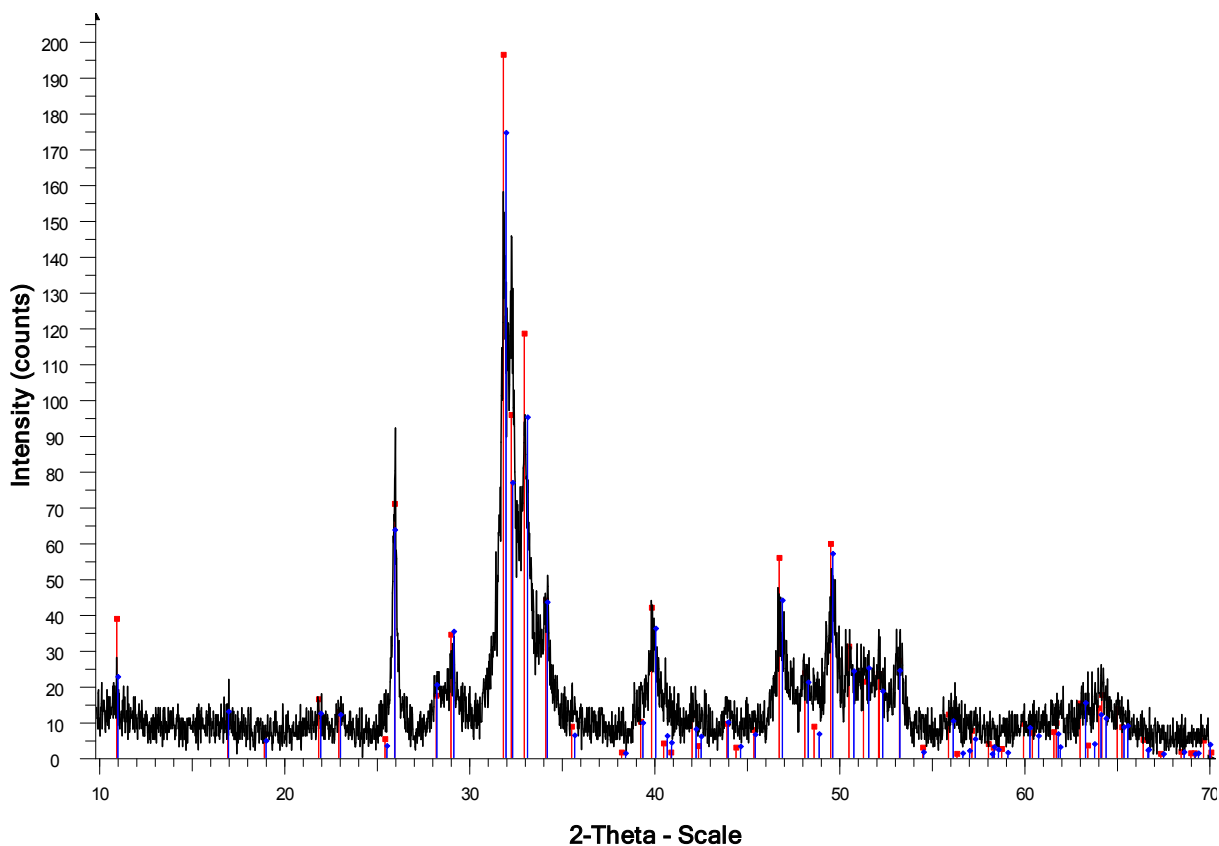

90HA (small)-10HA (big) - File: 90HA (small)-10HA (big).raw - Type: 2Th/Th locked - Start: 4.989 ° - End: 69.991 ° - Step: 0.020 ° - Step time: 1. s - Anode: Cu - WL1: 1.5406 - WL2: 1.54439 - C  
 04-010-6315 (A) - hydroxylapatite, syn - Ca<sub>5</sub>(PO<sub>4</sub>)<sub>3</sub>(OH) - WL: 1.5406 - Hexagonal - a 9.42183 - b 9.42183 - c 6.87844 - alpha 90.000 - beta 90.000 - gamma 120.000 - Primitive - P63/m (176) -  
 01-086-0740 (A) - Hydroxylapatite - Ca<sub>5</sub>(PO<sub>4</sub>)<sub>3</sub>(OH) - WL: 1.5406 - Hexagonal - a 9.37276 - b 9.37276 - c 6.87600 - alpha 90.000 - beta 90.000 - gamma 120.000 - Primitive - P63/m (176) - 2 -

**90HA (small)-10HA (big)**

Sample name: 10HA (big)-90HA (small)

Concentrations:

|             |       |                                                      |                      |
|-------------|-------|------------------------------------------------------|----------------------|
| 04-010-6315 | 25.8% | Ca <sub>5</sub> (PO <sub>4</sub> ) <sub>3</sub> (OH) | Hydroxylapatite, syn |
| 01-086-0740 | 74.2% | Ca <sub>5</sub> (PO <sub>4</sub> ) <sub>3</sub> (OH) | Hydroxylapatite      |

  

|                              |                           |                                                      |
|------------------------------|---------------------------|------------------------------------------------------|
| 04-010-6315                  | Hydroxylapatite, syn----- | Ca <sub>5</sub> (PO <sub>4</sub> ) <sub>3</sub> (OH) |
| Crystallite Size (Scherrer): | 427.2                     | Å                                                    |
| System:                      | Hexagonal                 |                                                      |
| Space group:                 | P63/m (176)               |                                                      |
| Cell param.:                 | Initial                   | Final                                                |
| a:                           | 9.42264                   | 9.42183                                              |
| c:                           | 6.87535                   | 6.87844                                              |

|                              |                      |                                                      |
|------------------------------|----------------------|------------------------------------------------------|
| 01-086-0740                  | Hydroxylapatite----- | Ca <sub>5</sub> (PO <sub>4</sub> ) <sub>3</sub> (OH) |
| Crystallite Size (Scherrer): | 101.4                | Å                                                    |
| System:                      | Hexagonal            |                                                      |
| Space group:                 | P63/m (176)          |                                                      |
| Cell param.:                 | Initial              | Final                                                |
| a:                           | 9.38193              | 9.37276                                              |
| c:                           | 6.87481              | 6.87600                                              |

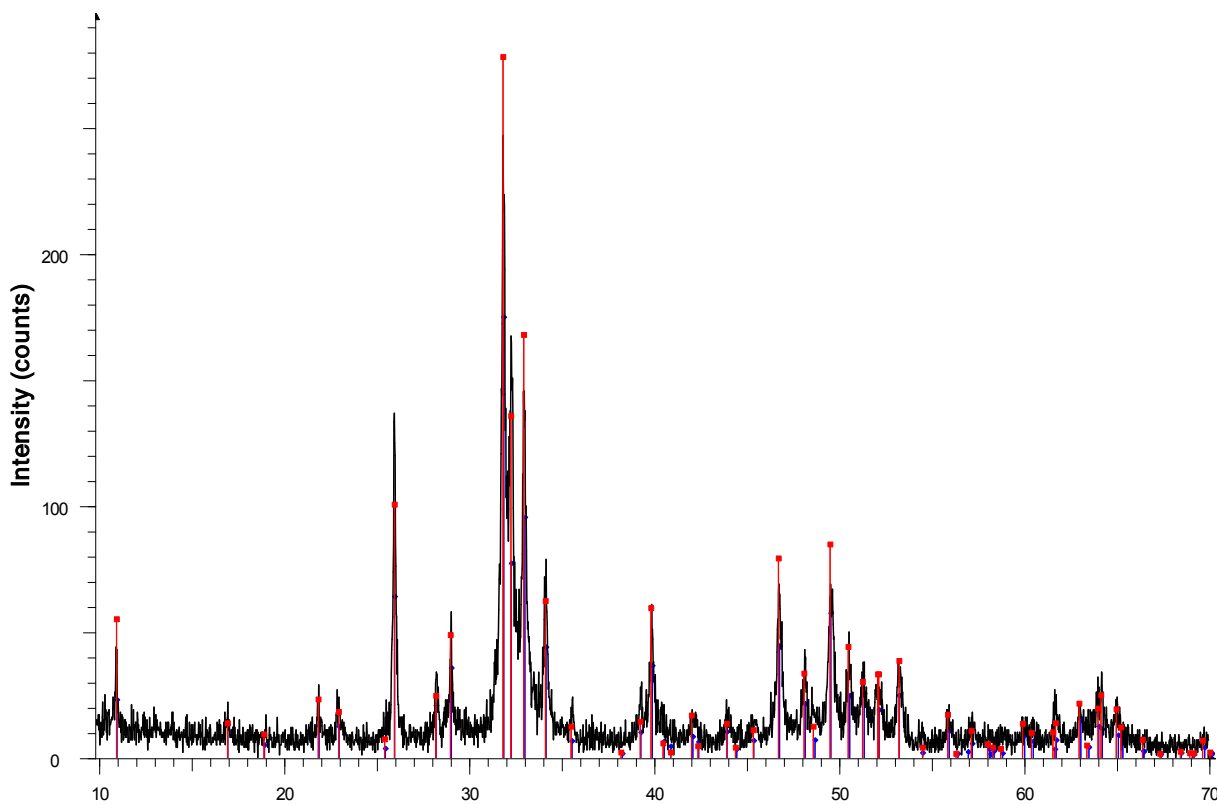

50HA (small)-50HA (big) - File: 50HA (small)-50HA (big).raw - Type: 2Th/Th locked - Start: 5.005 ° - End: 70.004 ° - Step: 0.020 ° - Step time: 1. s - Anode: Cu - WL1: 1.5406 - WL2: 1.54439 - C  
 04-010-6315 (A) - hydroxylapatite, syn - Ca<sub>5</sub>(PO<sub>4</sub>)<sub>3</sub>(OH) - WL: 1.5406 - Hexagonal - a 9.42451 - b 9.42451 - c 6.87783 - alpha 90.000 - beta 90.000 - gamma 120.000 - Primitive - P63/m (176) -  
 01-086-0740 (A) - Hydroxylapatite - Ca<sub>5</sub>(PO<sub>4</sub>)<sub>3</sub>(OH) - WL: 1.5406 - Hexagonal - a 9.40909 - b 9.40909 - c 6.87724 - alpha 90.000 - beta 90.000 - gamma 120.000 - Primitive - P63/m (176) - 2 -

**50HA (small)-50HA (big)**

Sample name: 50HA (big)-50HA (small)

Concentrations:

|             |       |                                                      |                      |
|-------------|-------|------------------------------------------------------|----------------------|
| 04-010-6315 | 42.6% | Ca <sub>5</sub> (PO <sub>4</sub> ) <sub>3</sub> (OH) | Hydroxylapatite, syn |
| 01-086-0740 | 57.4% | Ca <sub>5</sub> (PO <sub>4</sub> ) <sub>3</sub> (OH) | Hydroxylapatite      |

  

|                              |                           |                                                      |
|------------------------------|---------------------------|------------------------------------------------------|
| 04-010-6315                  | Hydroxylapatite, syn----- | Ca <sub>5</sub> (PO <sub>4</sub> ) <sub>3</sub> (OH) |
| Crystallite Size (Scherrer): | 648.7                     | Å                                                    |
| System:                      | Hexagonal                 |                                                      |
| Space group:                 | P63/m (176)               |                                                      |
| Cell param.:                 | Initial                   | Final                                                |
| a:                           | 9.41931                   | 9.42451                                              |
| c:                           | 6.87414                   | 6.87783                                              |

|                              |                      |                                                      |
|------------------------------|----------------------|------------------------------------------------------|
| 01-086-0740                  | Hydroxylapatite----- | Ca <sub>5</sub> (PO <sub>4</sub> ) <sub>3</sub> (OH) |
| Crystallite Size (Scherrer): | 153.5                | Å                                                    |
| System:                      | Hexagonal            |                                                      |
| Space group:                 | P63/m (176)          |                                                      |
| Cell param.:                 | Initial              | Final                                                |
| a:                           | 9.40032              | 9.40909                                              |
| c:                           | 6.88159              | 6.87724                                              |
